# Supplementary material for: Two novel open-framework zinc phosphates: (CH3NH3)Zn4(PO4)3 and (CH3NH3)2Zn5(PO4)4Electronic supplementary information (ESI) available: tables for atomic coordinates and anisotropic parameters and full list of bond lengths and bond angles. See http://www.rsc.org/suppdata/jm/b3/b303910b/
Source: Royal Society of Chemistry journal article supplement (doi:10.1039/b303910b), 2003-01-01
Supplement: b303910b.pdf [file b303910b.pdf]

**Table 1.** Crystal data and structure refinement for (ma)Zn<sub>4</sub>(PO<sub>4</sub>)<sub>3</sub>.

|                                     |                                                                                                                                        |
|-------------------------------------|----------------------------------------------------------------------------------------------------------------------------------------|
| Identification code                 | Zn4P3                                                                                                                                  |
| Empirical formula                   | CH <sub>6</sub> NO <sub>12</sub> P <sub>3</sub> Zn <sub>4</sub>                                                                        |
| Formula weight                      | 578.46                                                                                                                                 |
| Temperature                         | 295(2) K                                                                                                                               |
| Crystal size                        | 0.29 × 0.14 × 0.09 mm <sup>3</sup>                                                                                                     |
| Crystal habit                       | colorless prism                                                                                                                        |
| Crystal system                      | Orthorhombic                                                                                                                           |
| Space group                         | <i>Pbca</i>                                                                                                                            |
| Unit cell dimensions                | a = 14.6797(6) Å      α = 90°<br>b = 10.1204(4) Å      β = 90°<br>c = 16.6015(7) Å      γ = 90°                                        |
| Volume                              | 2466.39(17) Å <sup>3</sup>                                                                                                             |
| Z                                   | 8                                                                                                                                      |
| Density, ρ <sub>calc</sub>          | 3.116 g/cm <sup>3</sup>                                                                                                                |
| Absorption coefficient, μ           | 8.140 mm <sup>-1</sup>                                                                                                                 |
| F(000)                              | 2240 e <sup>-</sup>                                                                                                                    |
| Diffractometer                      | Bruker Smart Apex CCD area detector                                                                                                    |
| Radiation source                    | fine-focus sealed tube, MoKα, 0.71073 Å                                                                                                |
| θ range for data collection         | 2.45 to 30.51°                                                                                                                         |
| Index ranges                        | -20 ≤ h ≤ 20, -14 ≤ k ≤ 14, -23 ≤ l ≤ 23                                                                                               |
| Reflections collected               | 27937                                                                                                                                  |
| Independent reflections             | 3750                                                                                                                                   |
| Observed reflection, I > 2σ(I)      | 3409                                                                                                                                   |
| Coverage of independent reflections | 99.6 %                                                                                                                                 |
| Variation in check reflections      | 0.05 %                                                                                                                                 |
| Absorption correction               | Semi-empirical from equivalents SADABS                                                                                                 |
| Max. and min. transmission          | 0.4807 and 0.2750                                                                                                                      |
| Structure solution technique        | direct                                                                                                                                 |
| Refinement technique                | Full-matrix least-squares on F <sup>2</sup>                                                                                            |
| Function minimized                  | Σw(F <sub>o</sub> <sup>2</sup> - F <sub>c</sub> <sup>2</sup> ) <sup>2</sup>                                                            |
| Data / restraints / parameters      | 3750 / 6 / 217                                                                                                                         |
| Goodness-of-fit on F <sup>2</sup>   | 1.043                                                                                                                                  |
| Δ/σ <sub>max</sub>                  | 0.001                                                                                                                                  |
| Final R indices:                    | R <sub>1</sub> , I > 2σ(I)      0.0240<br>wR <sub>2</sub> , all data      0.0555<br>R <sub>int</sub> 0.0413<br>R <sub>sig</sub> 0.0251 |
| Extinction coefficient              | 0.00128(8)                                                                                                                             |
| Largest diff. peak and hole         | 0.591 and -0.467 e <sup>-</sup> /Å <sup>3</sup>                                                                                        |

$$R_1 = \frac{\sum ||F_o| - |F_c||}{\sum |F_o|}, \quad wR_2 = [\frac{\sum w(F_o^2 - F_c^2)^2}{\sum w(F_o^2)^2}]^{1/2}$$

**Table 2.** Atomic coordinates and equivalent\* isotropic atomic displacement parameters ( $\text{\AA}^2$ ) for (ma)Zn<sub>4</sub>(PO<sub>4</sub>)<sub>3</sub>.

| Atom | <i>x/a</i>   | <i>y/b</i>  | <i>z/c</i>   | U <sub>eq</sub> |
|------|--------------|-------------|--------------|-----------------|
| Zn1  | 0.143310(17) | 0.87693(2)  | 0.226671(15) | 0.01001(7)      |
| Zn2  | 0.365668(17) | 0.89255(2)  | 0.195273(16) | 0.00995(7)      |
| Zn3  | 0.448530(18) | 1.15139(2)  | 0.089206(16) | 0.01154(7)      |
| Zn4  | 0.431142(18) | 0.65219(3)  | 0.058045(16) | 0.01128(7)      |
| P1   | 0.25741(4)   | 0.62824(5)  | 0.16315(3)   | 0.00832(10)     |
| P2   | 0.55109(4)   | 0.88202(5)  | 0.10500(3)   | 0.00902(11)     |
| P3   | 0.53918(4)   | 0.39803(5)  | 0.12570(3)   | 0.00910(11)     |
| O1   | 0.25332(10)  | 0.77675(16) | 0.18759(10)  | 0.0119(3)       |
| O2   | 0.05174(11)  | 0.82628(17) | 0.14889(11)  | 0.0159(3)       |
| O3   | 0.19700(12)  | 1.05113(16) | 0.23111(10)  | 0.0159(3)       |
| O4   | 0.11792(11)  | 0.82320(17) | 0.33431(10)  | 0.0149(3)       |
| O5   | 0.34181(10)  | 1.07592(15) | 0.15445(10)  | 0.0114(3)       |
| O6   | 0.45376(11)  | 0.82081(16) | 0.11795(10)  | 0.0135(3)       |
| O7   | 0.39314(13)  | 0.89155(19) | 0.30601(10)  | 0.0209(4)       |
| O8   | 0.54329(12)  | 1.02991(16) | 0.11857(12)  | 0.0189(4)       |
| O9   | 0.41612(12)  | 1.15847(19) | -0.02184(10) | 0.0192(4)       |
| O10  | 0.30641(12)  | 0.61394(17) | 0.08388(11)  | 0.0173(3)       |
| O11  | 0.52127(13)  | 0.53793(16) | 0.10017(12)  | 0.0218(4)       |
| O12  | 0.42425(11)  | 0.68738(17) | -0.05594(9)  | 0.0145(3)       |
| C1   | 0.2458(2)    | 0.5902(4)   | 0.4616(2)    | 0.0314(7)       |
| N1   | 0.26675(16)  | 0.6706(2)   | 0.39028(14)  | 0.0199(4)       |

\* U<sub>eq</sub> is defined as one third of the trace of the orthogonalized U<sub>ij</sub> tensor.

**Table 3.** Anisotropic atomic displacement parameters\* ( $\text{\AA}^2$ ) for (ma)Zn<sub>4</sub>(PO<sub>4</sub>)<sub>3</sub>.

| Atom | U <sub>11</sub> | U <sub>22</sub> | U <sub>33</sub> | U <sub>23</sub> | U <sub>13</sub> | U <sub>12</sub> |
|------|-----------------|-----------------|-----------------|-----------------|-----------------|-----------------|
| Zn1  | 0.00913(12)     | 0.01139(12)     | 0.00950(12)     | 0.00012(9)      | 0.00052(9)      | -0.00084(9)     |
| Zn2  | 0.00925(12)     | 0.01063(12)     | 0.00998(12)     | 0.00013(9)      | -0.00003(9)     | 0.00008(9)      |
| Zn3  | 0.01341(13)     | 0.01137(12)     | 0.00984(12)     | -0.00063(9)     | 0.00031(9)      | 0.00149(9)      |
| Zn4  | 0.01215(13)     | 0.01184(12)     | 0.00986(12)     | -0.00049(9)     | 0.00123(9)      | 0.00008(9)      |
| P1   | 0.0075(2)       | 0.0074(2)       | 0.0101(2)       | -0.00065(18)    | -0.00002(19)    | -0.00014(17)    |
| P2   | 0.0083(2)       | 0.0101(2)       | 0.0087(2)       | -0.00063(18)    | -0.00071(19)    | 0.00063(18)     |
| P3   | 0.0092(2)       | 0.0093(2)       | 0.0088(2)       | -0.00031(18)    | -0.00020(19)    | 0.00007(19)     |
| O1   | 0.0094(7)       | 0.0094(7)       | 0.0168(8)       | -0.0010(6)      | 0.0000(6)       | -0.0007(5)      |
| O2   | 0.0133(8)       | 0.0154(8)       | 0.0189(8)       | -0.0042(6)      | -0.0072(6)      | 0.0036(6)       |
| O3   | 0.0182(8)       | 0.0127(7)       | 0.0169(8)       | 0.0000(6)       | 0.0065(7)       | -0.0039(6)      |
| O4   | 0.0155(8)       | 0.0189(8)       | 0.0105(7)       | 0.0033(6)       | 0.0048(6)       | 0.0057(6)       |
| O5   | 0.0093(7)       | 0.0103(7)       | 0.0147(8)       | 0.0023(6)       | 0.0003(6)       | 0.0019(6)       |
| O6   | 0.0096(7)       | 0.0138(7)       | 0.0170(8)       | -0.0050(6)      | 0.0034(6)       | -0.0022(6)      |
| O7   | 0.0209(9)       | 0.0296(10)      | 0.0122(8)       | 0.0019(7)       | -0.0065(7)      | -0.0021(7)      |
| O8   | 0.0147(8)       | 0.0098(7)       | 0.0323(10)      | -0.0016(7)      | -0.0045(7)      | 0.0013(6)       |
| O9   | 0.0165(8)       | 0.0333(10)      | 0.0078(7)       | -0.0018(7)      | 0.0017(6)       | 0.0008(7)       |
| O10  | 0.0134(8)       | 0.0232(9)       | 0.0151(8)       | -0.0057(6)      | 0.0064(6)       | -0.0056(7)      |
| O11  | 0.0199(9)       | 0.0115(8)       | 0.0340(11)      | 0.0048(7)       | -0.0046(8)      | 0.0019(7)       |
| O12  | 0.0170(8)       | 0.0180(8)       | 0.0084(7)       | -0.0015(6)      | 0.0019(6)       | 0.0036(6)       |
| C1   | 0.0273(15)      | 0.0343(16)      | 0.0326(16)      | 0.0136(13)      | 0.0003(13)      | 0.0006(13)      |
| N1   | 0.0174(11)      | 0.0214(11)      | 0.0209(11)      | 0.0028(9)       | 0.0000(9)       | 0.0023(9)       |

\* The anisotropic atomic displacement factor exponent takes the form:  $-2\pi^2 [ h^2 a^{*2} U_{11} + \dots + 2hka^*b^*U_{12} ]$

**Table 4.** Hydrogen atom coordinates and isotropic atomic displacement parameters ( $\text{\AA}^2$ ) for (ma)Zn<sub>4</sub>(PO<sub>4</sub>)<sub>3</sub>.

| Atom | $x/a$      | $y/b$    | $z/c$      | U <sub>iso</sub> |
|------|------------|----------|------------|------------------|
| H1C  | 0.297(3)   | 0.544(4) | 0.477(3)   | 0.078(15)        |
| H2C  | 0.220(4)   | 0.645(4) | 0.500(3)   | 0.09(2)          |
| H3C  | 0.205(3)   | 0.526(4) | 0.442(3)   | 0.084(17)        |
| H1N  | 0.3098(18) | 0.719(3) | 0.3998(19) | 0.026(9)         |
| H2N  | 0.2212(19) | 0.713(3) | 0.378(2)   | 0.038(10)        |
| H3N  | 0.284(2)   | 0.627(3) | 0.3522(18) | 0.032(10)        |

**Table 5.** Bond lengths [Å] and angles [°] for (ma)Zn<sub>4</sub>(PO<sub>4</sub>)<sub>3</sub>.

|                 |            |                     |            |
|-----------------|------------|---------------------|------------|
| Zn(1)-O(4)      | 1.9047(16) | O(7)-Zn(2)-O(6)     | 119.74(8)  |
| Zn(1)-O(3)      | 1.9325(16) | O(7)-Zn(2)-O(5)     | 111.85(7)  |
| Zn(1)-O(2)      | 1.9331(16) | O(6)-Zn(2)-O(5)     | 103.67(7)  |
| Zn(1)-O(1)      | 2.0141(15) | O(7)-Zn(2)-O(1)     | 103.46(7)  |
| Zn(2)-O(7)      | 1.8821(17) | O(6)-Zn(2)-O(1)     | 106.33(6)  |
| Zn(2)-O(6)      | 1.9614(16) | O(5)-Zn(2)-O(1)     | 111.80(6)  |
| Zn(2)-O(5)      | 2.0065(15) | O(9)-Zn(3)-O(8)     | 116.79(8)  |
| Zn(2)-O(1)      | 2.0272(15) | O(9)-Zn(3)-O(2)#1   | 116.06(8)  |
| Zn(3)-O(9)      | 1.9053(17) | O(8)-Zn(3)-O(2)#1   | 115.86(7)  |
| Zn(3)-O(8)      | 1.9195(17) | O(9)-Zn(3)-O(5)     | 109.52(7)  |
| Zn(3)-O(2)#1    | 2.0284(17) | O(8)-Zn(3)-O(5)     | 100.42(7)  |
| Zn(3)-O(5)      | 2.0520(16) | O(2)#1-Zn(3)-O(5)   | 93.75(6)   |
| Zn(4)-O(11)     | 1.8912(17) | O(11)-Zn(4)-O(10)   | 117.47(8)  |
| Zn(4)-O(10)     | 1.9201(17) | O(11)-Zn(4)-O(12)   | 120.84(8)  |
| Zn(4)-O(12)     | 1.9283(16) | O(10)-Zn(4)-O(12)   | 101.91(7)  |
| Zn(4)-O(6)      | 2.0029(16) | O(11)-Zn(4)-O(6)    | 102.79(7)  |
| P(1)-O(10)      | 1.5066(17) | O(10)-Zn(4)-O(6)    | 102.65(7)  |
| P(1)-O(3)#2     | 1.5265(17) | O(12)-Zn(4)-O(6)    | 109.79(7)  |
| P(1)-O(5)#2     | 1.5565(16) | O(10)-P(1)-O(3)#2   | 112.78(10) |
| P(1)-O(1)       | 1.5580(16) | O(10)-P(1)-O(5)#2   | 109.46(9)  |
| P(2)-O(8)       | 1.5179(17) | O(3)#2-P(1)-O(5)#2  | 107.76(9)  |
| P(2)-O(9)#3     | 1.5183(18) | O(10)-P(1)-O(1)     | 109.79(9)  |
| P(2)-O(4)#4     | 1.5270(17) | O(3)#2-P(1)-O(1)    | 108.52(9)  |
| P(2)-O(6)       | 1.5721(16) | O(5)#2-P(1)-O(1)    | 108.43(8)  |
| P(3)-O(11)      | 1.5011(17) | O(8)-P(2)-O(9)#3    | 115.15(11) |
| P(3)-O(7)#5     | 1.5089(18) | O(8)-P(2)-O(4)#4    | 109.56(10) |
| P(3)-O(12)#6    | 1.5417(17) | O(9)#3-P(2)-O(4)#4  | 106.93(10) |
| P(3)-O(2)#2     | 1.5675(17) | O(8)-P(2)-O(6)      | 107.44(9)  |
| P(3)-Zn(3)#7    | 2.8928(6)  | O(9)#3-P(2)-O(6)    | 107.83(10) |
| C(1)-N(1)       | 1.469(4)   | O(4)#4-P(2)-O(6)    | 109.88(10) |
|                 |            | O(11)-P(3)-O(7)#5   | 111.62(11) |
| O(4)-Zn(1)-O(3) | 107.72(7)  | O(11)-P(3)-O(12)#6  | 112.19(10) |
| O(4)-Zn(1)-O(2) | 114.51(8)  | O(7)#5-P(3)-O(12)#6 | 108.10(10) |
| O(3)-Zn(1)-O(2) | 123.43(7)  | O(11)-P(3)-O(2)#2   | 110.92(10) |
| O(4)-Zn(1)-O(1) | 108.39(7)  | O(7)#5-P(3)-O(2)#2  | 110.86(10) |
| O(3)-Zn(1)-O(1) | 98.31(7)   | O(12)#6-P(3)-O(2)#2 | 102.78(9)  |
| O(2)-Zn(1)-O(1) | 102.06(7)  | O(11)-P(3)-Zn(3)#7  | 132.39(8)  |

|                      |            |                    |            |
|----------------------|------------|--------------------|------------|
| O(7)#5-P(3)-Zn(3)#7  | 115.01(8)  | P(1)#1-O(5)-Zn(3)  | 129.55(9)  |
| O(12)#6-P(3)-Zn(3)#7 | 61.25(7)   | Zn(2)-O(5)-Zn(3)   | 112.91(7)  |
| O(2)#2-P(3)-Zn(3)#7  | 42.27(6)   | P(2)-O(6)-Zn(2)    | 122.88(9)  |
| P(1)-O(1)-Zn(1)      | 126.90(9)  | P(2)-O(6)-Zn(4)    | 114.74(9)  |
| P(1)-O(1)-Zn(2)      | 122.87(9)  | Zn(2)-O(6)-Zn(4)   | 122.08(8)  |
| Zn(1)-O(1)-Zn(2)     | 109.94(7)  | P(3)#9-O(7)-Zn(2)  | 151.02(13) |
| P(3)#1-O(2)-Zn(1)    | 129.29(10) | P(2)-O(8)-Zn(3)    | 130.43(11) |
| P(3)#1-O(2)-Zn(3)#2  | 106.42(9)  | P(2)#3-O(9)-Zn(3)  | 142.23(12) |
| Zn(1)-O(2)-Zn(3)#2   | 123.99(8)  | P(1)-O(10)-Zn(4)   | 129.13(11) |
| P(1)#1-O(3)-Zn(1)    | 128.10(10) | P(3)-O(11)-Zn(4)   | 143.48(12) |
| P(2)#8-O(4)-Zn(1)    | 129.31(10) | P(3)#6-O(12)-Zn(4) | 127.98(10) |
| P(1)#1-O(5)-Zn(2)    | 116.53(9)  |                    |            |

Symmetry transformations: #1  $-x+1/2, y+1/2, z$  #2  $-x+1/2, y-1/2, z$  #3  $-x+1, -y+2, -z$  #4  $x+1/2, y, -z+1/2$  #5  $-x+1, y-1/2, -z+1/2$   
#6  $-x+1, -y+1, -z$  #7  $x, y-1, z$  #8  $x-1/2, y, -z+1/2$  #9  $-x+1, y+1/2, -z+1/2$

**Table 6.** Hydrogen bonds for (ma)Zn<sub>4</sub>(PO<sub>4</sub>)<sub>3</sub> [Å and °].

| D—H...A        | d(D—H)  | d(H...A) | d(D...A) | ∠(DHA) |
|----------------|---------|----------|----------|--------|
| N1—H1N...O12#1 | 0.82(2) | 2.06(2)  | 2.865(3) | 167(3) |
| N1—H1N...O7    | 0.82(2) | 2.64(3)  | 3.225(3) | 130(3) |
| N1—H2N...O4    | 0.82(2) | 2.02(2)  | 2.832(3) | 172(4) |
| N1—H3N...O3#2  | 0.81(2) | 2.17(3)  | 2.954(3) | 163(3) |

Symmetry transformations: #1  $x, -y+3/2, z+1/2$  #2  $-x+1/2, y-1/2,$

**Table 7.** Crystal data and structure refinement for (ma)<sub>2</sub>Zn<sub>5</sub>(PO<sub>4</sub>)<sub>4</sub>.

|                                     |                                                                                                                              |
|-------------------------------------|------------------------------------------------------------------------------------------------------------------------------|
| Identification code                 | Zn5P4                                                                                                                        |
| Empirical formula                   | C <sub>2</sub> H <sub>12</sub> N <sub>2</sub> O <sub>16</sub> P <sub>4</sub> Zn <sub>5</sub>                                 |
| Formula weight                      | 770.87                                                                                                                       |
| Temperature                         | 296 K                                                                                                                        |
| Crystal size                        | 0.14 × 0.03 × 0.02 mm <sup>3</sup>                                                                                           |
| Crystal habit                       | colorless needle                                                                                                             |
| Crystal system                      | Orthorhombic                                                                                                                 |
| Space group                         | <i>P</i> 2 <sub>1</sub> 2 <sub>1</sub> 2 <sub>1</sub>                                                                        |
| Unit cell dimensions                | a = 7.2590(19) Å      α = 90°<br>b = 13.407(4) Å      β = 90°<br>c = 18.031(5) Å      γ = 90°                                |
| Volume                              | 1754.8(8) Å <sup>3</sup>                                                                                                     |
| Z                                   | 4                                                                                                                            |
| Density, ρ <sub>calc</sub>          | 2.918 g/cm <sup>3</sup>                                                                                                      |
| Absorption coefficient, μ           | 7.187 mm <sup>-1</sup>                                                                                                       |
| F(000)                              | 1504 e <sup>-</sup>                                                                                                          |
| Diffractometer                      | Bruker Smart Apex CCD area detector                                                                                          |
| Radiation source                    | fine-focus sealed tube, MoKα, 0.71073 Å                                                                                      |
| θ range for data collection         | 1.89 to 22.72°                                                                                                               |
| Index ranges                        | -7 ≤ h ≤ 7, -14 ≤ k ≤ 14, -19 ≤ l ≤ 19                                                                                       |
| Reflections collected               | 11139                                                                                                                        |
| Independent reflections             | 2336                                                                                                                         |
| Observed reflection, I > 2σ(I)      | 2128                                                                                                                         |
| Coverage of independent reflections | 98.6 %                                                                                                                       |
| Variation in check reflections      | 0.1 %                                                                                                                        |
| Absorption correction               | Semi-empirical from equivalents XPREP                                                                                        |
| Max. and min. transmission          | 0.8661 and 0.6969                                                                                                            |
| Structure solution technique        | direct                                                                                                                       |
| Refinement technique                | Full-matrix least-squares on F <sup>2</sup>                                                                                  |
| Function minimized                  | Σw(F <sub>o</sub> <sup>2</sup> - F <sub>c</sub> <sup>2</sup> ) <sup>2</sup>                                                  |
| Data / restraints / parameters      | 2336 / 0 / 188                                                                                                               |
| Goodness-of-fit on F <sup>2</sup>   | 1.095                                                                                                                        |
| Δ/σ <sub>max</sub>                  | 0.000                                                                                                                        |
| Final R indices:                    | R <sub>1</sub> , I > 2σ(I) 0.0774<br>wR <sub>2</sub> , all data 0.1805<br>R <sub>int</sub> 0.1392<br>R <sub>sig</sub> 0.1083 |
| Absolute structure parameter        | 0.0(8)                                                                                                                       |
| Extinction coefficient              | 0.089(3)                                                                                                                     |
| Largest diff. peak and hole         | 1.158 and -1.174 e <sup>-</sup> /Å <sup>3</sup>                                                                              |

$$R_1 = \frac{\sum ||F_o| - |F_c||}{\sum |F_o|}, \quad wR_2 = \left[ \frac{\sum w(F_o^2 - F_c^2)^2}{\sum w(F_o^2)^2} \right]^{1/2}$$

**Table 8.** Atomic coordinates and equivalent\* isotropic atomic displacement parameters ( $\text{\AA}^2$ ) for  $(\text{ma})_2\text{Zn}_5(\text{PO}_4)_4$ .

| Atom | $x/a$       | $y/b$        | $z/c$       | $U_{\text{eq}}$ |
|------|-------------|--------------|-------------|-----------------|
| Zn1  | 0.4865(3)   | 0.61494(16)  | 0.20659(13) | 0.0161(6)       |
| Zn2  | 0.4992(3)   | 0.37066(17)  | 0.22291(12) | 0.0175(6)       |
| Zn3  | 0.1428(3)   | -0.00154(18) | 0.08123(12) | 0.0164(5)       |
| Zn4  | -0.0536(3)  | 0.35794(18)  | 0.19721(13) | 0.0176(6)       |
| Zn5  | -0.0576(3)  | 0.61190(17)  | 0.18609(13) | 0.0176(6)       |
| P1   | 0.6823(6)   | 0.4804(4)    | 0.0934(3)   | 0.0143(12)      |
| P2   | 0.2604(8)   | 0.1908(4)    | 0.1709(3)   | 0.0166(13)      |
| P3   | 0.2404(7)   | -0.2113(4)   | 0.1526(3)   | 0.0150(13)      |
| P4   | 0.1895(6)   | 0.4961(4)    | 0.2930(3)   | 0.0167(12)      |
| O1   | 0.406(2)    | 0.7209(11)   | 0.1423(8)   | 0.026(4)        |
| O2   | 0.5313(17)  | 0.4855(11)   | 0.1569(7)   | 0.022(3)        |
| O3   | 0.303(2)    | 0.5893(11)   | 0.2814(9)   | 0.027(4)        |
| O4   | 0.3046(19)  | 0.4033(11)   | 0.2904(8)   | 0.022(3)        |
| O5   | 0.427(2)    | 0.2642(11)   | 0.1609(8)   | 0.026(4)        |
| O6   | 0.2882(17)  | 0.1122(10)   | 0.1135(7)   | 0.014(3)        |
| O7   | 0.0819(19)  | 0.0233(11)   | -0.0212(8)  | 0.029(4)        |
| O8   | 0.2384(18)  | -0.1371(10)  | 0.0911(8)   | 0.021(3)        |
| O9   | -0.0936(16) | 0.0052(11)   | 0.1334(7)   | 0.020(3)        |
| O10  | 0.071(2)    | 0.2405(11)   | 0.1645(8)   | 0.027(4)        |
| O11  | -0.2590(19) | 0.3408(11)   | 0.2713(8)   | 0.021(3)        |
| O12  | -0.2015(18) | 0.3872(10)   | 0.1099(7)   | 0.017(3)        |
| O13  | 0.0434(17)  | 0.4888(10)   | 0.2306(7)   | 0.021(3)        |
| O14  | -0.2010(19) | 0.5719(11)   | 0.0987(8)   | 0.022(3)        |
| O15  | -0.2737(19) | 0.6479(10)   | 0.2495(8)   | 0.022(3)        |
| O16  | 0.060(2)    | 0.7309(10)   | 0.1525(7)   | 0.018(3)        |
| N1   | 0.721(3)    | 0.7805(16)   | 0.0614(13)  | 0.049(7)        |
| C1   | 0.688(4)    | 0.8629(19)   | 0.0179(13)  | 0.039(7)        |
| N2   | 0.713(3)    | 0.1844(13)   | 0.0715(10)  | 0.028(5)        |
| C2   | 0.665(5)    | 0.159(4)     | -0.0023(16) | 0.104(16)       |

\*  $U_{\text{eq}}$  is defined as one third of the trace of the orthogonalized  $U_{ij}$  tensor.

**Table 9.** Anisotropic atomic displacement parameters\* ( $\text{\AA}^2$ ) for  $(\text{ma})_2\text{Zn}_5(\text{PO}_4)_4$ .

| Atom | $U_{11}$   | $U_{22}$   | $U_{33}$   | $U_{23}$    | $U_{13}$    | $U_{12}$    |
|------|------------|------------|------------|-------------|-------------|-------------|
| Zn1  | 0.0155(12) | 0.0153(12) | 0.0174(12) | -0.0020(10) | 0.0002(10)  | 0.0010(10)  |
| Zn2  | 0.0150(12) | 0.0182(13) | 0.0193(13) | 0.0007(10)  | -0.0003(10) | 0.0007(11)  |
| Zn3  | 0.0169(11) | 0.0179(12) | 0.0143(12) | 0.0030(11)  | 0.0032(9)   | 0.0005(12)  |
| Zn4  | 0.0120(11) | 0.0193(12) | 0.0215(13) | 0.0021(10)  | -0.0014(10) | 0.0034(11)  |
| Zn5  | 0.0189(12) | 0.0140(12) | 0.0199(14) | 0.0011(10)  | -0.0011(10) | -0.0025(11) |
| P1   | 0.012(2)   | 0.017(3)   | 0.015(3)   | 0.003(2)    | -0.0018(19) | 0.000(2)    |
| P2   | 0.016(3)   | 0.014(3)   | 0.020(3)   | 0.004(2)    | -0.005(2)   | -0.003(2)   |
| P3   | 0.006(3)   | 0.017(3)   | 0.022(3)   | 0.000(2)    | 0.000(2)    | -0.001(2)   |
| P4   | 0.016(2)   | 0.021(3)   | 0.013(3)   | -0.001(3)   | 0.0015(19)  | -0.003(3)   |
| N1   | 0.039(13)  | 0.052(13)  | 0.054(15)  | 0.042(12)   | 0.007(12)   | 0.009(12)   |
| C1   | 0.053(16)  | 0.046(16)  | 0.018(13)  | 0.009(12)   | -0.012(12)  | 0.003(15)   |
| N2   | 0.034(11)  | 0.028(10)  | 0.021(11)  | 0.011(9)    | 0.014(9)    | 0.030(10)   |
| C2   | 0.10(3)    | 0.19(4)    | 0.021(18)  | 0.00(2)     | 0.028(18)   | 0.09(3)     |

\* The anisotropic atomic displacement factor exponent takes the form:  $-2\pi^2 [ h^2a^2U_{11} + \dots + 2hka*b*U_{12} ]$

**Table 10.** Hydrogen atom coordinates and isotropic atomic displacement parameters ( $\text{\AA}^2$ ) for  $(\text{ma})_2\text{Zn}_5(\text{PO}_4)_4$ .

| Atom | $x/a$  | $y/b$  | $z/c$   | $U_{\text{iso}}$ |
|------|--------|--------|---------|------------------|
| H1A  | 0.7383 | 0.7275 | 0.0326  | 0.073            |
| H1B  | 0.6243 | 0.7698 | 0.0909  | 0.073            |
| H1C  | 0.8206 | 0.7909 | 0.0889  | 0.073            |
| H1D  | 0.7579 | 0.8578 | -0.0271 | 0.058            |
| H1E  | 0.7235 | 0.9220 | 0.0443  | 0.058            |
| H1F  | 0.5589 | 0.8663 | 0.0061  | 0.058            |
| H2A  | 0.8264 | 0.1633 | 0.0812  | 0.042            |
| H2B  | 0.6339 | 0.1556 | 0.1027  | 0.042            |
| H2C  | 0.7074 | 0.2503 | 0.0770  | 0.042            |
| H2D  | 0.5770 | 0.2061 | -0.0210 | 0.156            |
| H2E  | 0.6128 | 0.0933 | -0.0033 | 0.156            |
| H2F  | 0.7737 | 0.1604 | -0.0328 | 0.156            |



**Table 11.** Bond lengths [Å] and angles [°] for (ma)<sub>2</sub>Zn<sub>5</sub>(PO<sub>4</sub>)<sub>4</sub>.

|               |           |                      |          |
|---------------|-----------|----------------------|----------|
| Zn(1)-O(1)    | 1.924(15) | O(1)-Zn(1)-O(3)      | 110.1(6) |
| Zn(1)-O(3)    | 1.926(16) | O(1)-Zn(1)-O(15)#1   | 110.0(6) |
| Zn(1)-O(15)#1 | 1.956(14) | O(3)-Zn(1)-O(15)#1   | 112.2(6) |
| Zn(1)-O(2)    | 1.980(14) | O(1)-Zn(1)-O(2)      | 115.1(6) |
| Zn(2)-O(5)    | 1.887(15) | O(3)-Zn(1)-O(2)      | 105.9(6) |
| Zn(2)-O(4)    | 1.915(14) | O(15)#1-Zn(1)-O(2)   | 103.4(6) |
| Zn(2)-O(2)    | 1.959(14) | O(5)-Zn(2)-O(4)      | 110.1(6) |
| Zn(2)-O(11)#1 | 2.001(14) | O(5)-Zn(2)-O(2)      | 105.5(6) |
| Zn(3)-O(7)    | 1.928(14) | O(4)-Zn(2)-O(2)      | 107.1(6) |
| Zn(3)-O(6)    | 1.943(13) | O(5)-Zn(2)-O(11)#1   | 110.6(6) |
| Zn(3)-O(8)    | 1.953(14) | O(4)-Zn(2)-O(11)#1   | 114.6(6) |
| Zn(3)-O(9)    | 1.959(12) | O(2)-Zn(2)-O(11)#1   | 108.5(6) |
| Zn(4)-O(10)   | 1.908(15) | O(7)-Zn(3)-O(6)      | 106.0(6) |
| Zn(4)-O(12)   | 1.946(14) | O(7)-Zn(3)-O(8)      | 109.3(6) |
| Zn(4)-O(13)   | 1.984(14) | O(6)-Zn(3)-O(8)      | 120.6(6) |
| Zn(4)-O(11)   | 2.015(14) | O(7)-Zn(3)-O(9)      | 104.5(6) |
| Zn(5)-O(16)   | 1.907(14) | O(6)-Zn(3)-O(9)      | 107.2(6) |
| Zn(5)-O(14)   | 1.963(15) | O(8)-Zn(3)-O(9)      | 108.1(6) |
| Zn(5)-O(13)   | 1.976(14) | O(10)-Zn(4)-O(12)    | 100.2(6) |
| Zn(5)-O(15)   | 2.001(14) | O(10)-Zn(4)-O(13)    | 131.0(6) |
| P(1)-O(7)#2   | 1.493(15) | O(12)-Zn(4)-O(13)    | 105.2(6) |
| P(1)-O(14)#1  | 1.493(15) | O(10)-Zn(4)-O(11)    | 117.4(6) |
| P(1)-O(12)#1  | 1.537(15) | O(12)-Zn(4)-O(11)    | 98.7(5)  |
| P(1)-O(2)     | 1.587(14) | O(13)-Zn(4)-O(11)    | 99.3(6)  |
| P(2)-O(6)     | 1.491(14) | O(16)-Zn(5)-O(14)    | 102.2(6) |
| P(2)-O(10)    | 1.535(16) | O(16)-Zn(5)-O(13)    | 131.4(6) |
| P(2)-O(15)#3  | 1.548(15) | O(14)-Zn(5)-O(13)    | 107.1(6) |
| P(2)-O(5)     | 1.570(16) | O(16)-Zn(5)-O(15)    | 109.3(6) |
| P(3)-O(8)     | 1.490(15) | O(14)-Zn(5)-O(15)    | 96.3(6)  |
| P(3)-O(1)#4   | 1.519(16) | O(13)-Zn(5)-O(15)    | 105.1(6) |
| P(3)-O(16)#4  | 1.523(15) | O(7)#2-P(1)-O(14)#1  | 111.2(9) |
| P(3)-O(11)#3  | 1.545(15) | O(7)#2-P(1)-O(12)#1  | 114.1(8) |
| P(4)-O(4)     | 1.500(15) | O(14)#1-P(1)-O(12)#1 | 110.1(7) |
| P(4)-O(9)#5   | 1.504(14) | O(7)#2-P(1)-O(2)     | 107.1(8) |
| P(4)-O(3)     | 1.511(16) | O(14)#1-P(1)-O(2)    | 108.1(8) |
| P(4)-O(13)    | 1.550(14) | O(12)#1-P(1)-O(2)    | 105.9(8) |
| N(1)-C(1)     | 1.38(3)   | O(6)-P(2)-O(10)      | 112.1(8) |
| N(2)-C(2)     | 1.42(4)   | O(6)-P(2)-O(15)#3    | 111.9(8) |
|               |           | O(10)-P(2)-O(15)#3   | 106.6(8) |

|                      |           |                      |           |
|----------------------|-----------|----------------------|-----------|
| O(6)-P(2)-O(5)       | 105.0(8)  | P(4)-O(4)-Zn(2)      | 128.3(9)  |
| O(10)-P(2)-O(5)      | 114.2(8)  | P(2)-O(5)-Zn(2)      | 128.3(9)  |
| O(15)#3-P(2)-O(5)    | 107.0(8)  | P(2)-O(6)-Zn(3)      | 133.5(8)  |
| O(8)-P(3)-O(1)#4     | 108.5(9)  | P(1)#7-O(7)-Zn(3)    | 135.8(9)  |
| O(8)-P(3)-O(16)#4    | 109.3(8)  | P(3)-O(8)-Zn(3)      | 133.8(9)  |
| O(1)#4-P(3)-O(16)#4  | 112.0(8)  | P(4)#3-O(9)-Zn(3)    | 145.6(8)  |
| O(8)-P(3)-O(11)#3    | 111.1(8)  | P(2)-O(10)-Zn(4)     | 139.4(10) |
| O(1)#4-P(3)-O(11)#3  | 108.0(8)  | P(3)#5-O(11)-Zn(2)#8 | 123.7(8)  |
| O(16)#4-P(3)-O(11)#3 | 107.9(8)  | P(3)#5-O(11)-Zn(4)   | 125.1(8)  |
| O(4)-P(4)-O(9)#5     | 110.6(8)  | Zn(2)#8-O(11)-Zn(4)  | 109.7(7)  |
| O(4)-P(4)-O(3)       | 112.2(8)  | P(1)#8-O(12)-Zn(4)   | 128.6(8)  |
| O(9)#5-P(4)-O(3)     | 107.9(9)  | P(4)-O(13)-Zn(5)     | 119.7(8)  |
| O(4)-P(4)-O(13)      | 107.9(8)  | P(4)-O(13)-Zn(4)     | 121.3(8)  |
| O(9)#5-P(4)-O(13)    | 109.3(7)  | Zn(5)-O(13)-Zn(4)    | 119.0(6)  |
| O(3)-P(4)-O(13)      | 109.0(8)  | P(1)#8-O(14)-Zn(5)   | 125.2(9)  |
| P(3)#6-O(1)-Zn(1)    | 127.6(9)  | P(2)#5-O(15)-Zn(1)#8 | 120.4(8)  |
| P(1)-O(2)-Zn(2)      | 119.1(8)  | P(2)#5-O(15)-Zn(5)   | 124.8(8)  |
| P(1)-O(2)-Zn(1)      | 118.5(8)  | Zn(1)#8-O(15)-Zn(5)  | 114.6(7)  |
| Zn(2)-O(2)-Zn(1)     | 113.3(6)  | P(3)#6-O(16)-Zn(5)   | 144.1(9)  |
| P(4)-O(3)-Zn(1)      | 128.4(10) |                      |           |

Symmetry transformations: #1  $x+1, y, z$  #2  $x+1/2, -y+1/2, -z$  #3  $-x, y-1/2, -z+1/2$  #4  $x, y-1, z$   
#5  $-x, y+1/2, -z+1/2$  #6  $x, y+1, z$  #7  $x-1/2, -y+1/2, -z$  #8  $x-1, y, z$

**Table 12.** Hydrogen bonds for  $(ma)_2Zn_5(PO_4)_4$  [ $\text{\AA}$  and  $^\circ$ ].

| D—H...A        | d(D—H) | d(H...A) | d(D...A) | $\angle$ (DHA) |
|----------------|--------|----------|----------|----------------|
| N1—H1A...O14#1 | 0.89   | 2.44     | 2.93(2)  | 115.0          |
| N1—H1A...O8#2  | 0.89   | 2.54     | 3.36(3)  | 153.5          |
| N1—H1B...O1    | 0.89   | 1.95     | 2.83(3)  | 167.7          |
| N1—H1C...O16#1 | 0.89   | 2.23     | 3.03(3)  | 149.8          |
| N1—H1C...O4#3  | 0.89   | 2.80     | 3.14(3)  | 104.7          |
| N2—H2A...O9#1  | 0.89   | 2.39     | 3.00(2)  | 125.8          |
| N2—H2A...O10#1 | 0.89   | 2.54     | 3.18(3)  | 129.3          |
| N2—H2B...O5    | 0.89   | 2.34     | 2.84(2)  | 115.1          |
| N2—H2B...O3#4  | 0.89   | 2.32     | 2.95(2)  | 127.6          |
| N2—H2C...O12#1 | 0.89   | 2.04     | 2.87(2)  | 155.8          |

Symmetry transformations: #1  $x+1, y, z$  #2  $x+1/2, -y+1/2, -z$  #3  $-x+1, y+1/2, -z+1/2$  #4  $-x+1, y-1/2, -z+1/2$
